# Supplementary material for: Activity of Drug Combinations against Mycobacterium abscessus Grown in Aerobic and Hypoxic Conditions
Source: MDPI journal article supplement (doi:10.3390/microorganisms10071421), 2022-07-14
Supplement: s1 [file s1]

**Supplementary Table S1: MICs of Mab-10**

| Drug                            | MAB-10                | MIC interpretation<br>(S, I, R) <sup>a</sup> |
|---------------------------------|-----------------------|----------------------------------------------|
| Clarithromycin                  | 0.25/0.5 <sup>b</sup> | S                                            |
| Tigecycline                     | 0.25                  | n.a.                                         |
| Linezolid                       | 16                    | I                                            |
| Amikacin                        | 8 <sup>c</sup>        | S                                            |
| Moxifloxacin                    | 4                     | R                                            |
| Ciprofloxacin                   | 2                     | I                                            |
| Minocycline                     | >8                    | n.a.                                         |
| Trimethoprim / sulfamethoxazole | 4.0/76                | R                                            |
| Tobramycin                      | 8                     | R                                            |
| Doxycycline                     | >16                   | R                                            |
| Cefepime                        | >32                   | n.a.                                         |
| Imipenem                        | 16                    | I                                            |
| Amoxicillin /clavulanic acid    | >64/32                | n.a.                                         |
| Ceftriaxone                     | >64                   | n.a.                                         |
| Cefoxitin                       | 32                    | I                                            |
| Bedaquiline                     | 0.125                 | n.a.                                         |
| Rifabutin                       | 2                     | n.a.                                         |
| Clofazimine                     | 0.06                  | n.a.                                         |

<sup>a</sup> MIC breakpoints from the Clinical and Laboratory Standards Institute (CLSI) [32]: S, susceptible; I, intermediate; R, resistant

<sup>b</sup>Resistance of Mab-10 to clarithromycin was not induced since MIC increased only from 0.25 to 0.5 ug/ml when readings were done on day 5 and 14, respectively. Clarithromycin resistance is due to induction of *erm*(41) gene, and mutations of *rrl* (23S) gene [5]. Whole genome sequencing (WGS) analysis showed that *erm*(41) was not induced because it showed a mutation (Trp10Arg - nucleotide t28c), and that *rrl* had no mutations. Both observations are in keeping with clarithromycin susceptibility assessed by the MICs.

<sup>c</sup>The WGS analysis showed no mutations in the *rrs* (16S) gene, which is involved in amikacin resistance [5]. This observation is in keeping with amikacin susceptibility assessed by the MIC.

n.a., not applicable
