# Supplementary material for: Activity of Drug Combinations against Mycobacterium abscessus Grown in Aerobic and Hypoxic Conditions
Source: MDPI journal article supplement (doi:10.3390/microorganisms10071421), 2022-07-14
Supplement: s1 [file s1]

**Supplementary Table S2: drugs tested**

| Drug (abbreviation)  | Class                | Major indication              | C <sub>max</sub> (µg/ml) <sup>a</sup><br>[ref] |
|----------------------|----------------------|-------------------------------|------------------------------------------------|
| Bedaquiline (BDQ)    | Dyarylquinoline      | Tuberculosis                  | 1 [22]                                         |
| Amikacin (AMK)       | Aminoglycoside       | Gram (-) bacteria             | 8 [21]                                         |
| Rifabutin (RFB)      | Rifamycin            | <i>M. avium</i> complex       | 3 [36]                                         |
| Clarithromycin (CLR) | Macrolide            | Gram (+/-) bacteria           | 2 [37]                                         |
| Moxifloxacin (MXF)   | Fluoroquinolone      | Gram (+/-) bacteria           | 4 [21]                                         |
| Clofazimine (CLF)    | Riminophenazine      | Leprosy                       | 1 [22]                                         |
| Tigecycline (TGC)    | Tetracycline         | Gram (+/-) bacteria           | 1 [38]                                         |
| Linezolid (LNZ)      | Oxazolidinone        | Gram (+) bacteria             | 8 [39]                                         |
| Metronidazole (MTR)  | 5-nitroimidazole     | Anaerobic bacteria & protozoa | 8 [21]                                         |
| Secnidazole (SCN)    | 5-nitroimidazole     | Anaerobic bacteria & protozoa | 40 [40]                                        |
| Tinidazole (TND)     | 5-nitroimidazole     | Anaerobic bacteria & protozoa | 40 [41]                                        |
| Ornidazole (ORN)     | 5-nitroimidazole     | Protozoa infections           | 10 [42]                                        |
| Nimorazole (NMR)     | 5-nitroimidazole     | Protozoa. Radiosensitizer     | 40 [43]                                        |
| Benznidazole (BNZ)   | 2-nitroimidazole     | Trypanosomiasis               | 15 [44]                                        |
| Niclosamide (NCL)    | Nitro-benzamide      | Tapeworm infections           | 0.6 [45]                                       |
| Nitazoxanide (NTZ)   | Thiazolide           | Anaerobic bacteria & protozoa | 10 [25]                                        |
| Nitroxoline (NTR)    | Quinoline derivative | Urinary tract infections      | 6 [46]                                         |
| Colistin (CLS)       | Lipopeptide          | Gram (-) bacteria             | 25 & 100 [47]                                  |

<sup>a</sup> C<sub>max</sub>, maximum drug concentration in serum. C<sub>max</sub> in lungs was used for RFB. Concentrations in sputum were used for CLS.
